# Supplementary material
Source: MDPI journal article supplement (https://www.mdpi.com/2673-4672/3/1/9)
Supplement: s1 [file s1]

## Supplementary Materials

Influence of precipitation on the spatial distribution of  $^{210}\text{Pb}$ ,  $^7\text{Be}$ ,  $^{40}\text{K}$  and  $^{137}\text{Cs}$  in moss

Kayla Wilkins<sup>1</sup>, Hazel Cathcart<sup>1</sup>, Padraig Hickey<sup>2</sup>, Olwyn Hanley<sup>2</sup>, Luis León Vintró<sup>3</sup> and Julian Aherne<sup>1\*</sup>

<sup>1</sup> School of Environment, Trent University, Peterborough, Ontario K9L 0G2, Canada

<sup>2</sup> Office of Radiation Protection and Environmental Monitoring, Environmental Protection Agency, Dublin D14 YR62, Ireland

<sup>3</sup> UCD School of Physics, University College Dublin, Dublin D04 N2E5, Ireland

\*Correspondence: jaherne@trentu.ca

### Supplementary Materials: Tables and Figures

Table S1. Site ID,  $^{210}\text{Pb}$ ,  $^{137}\text{Cs}$ ,  $^7\text{Be}$  and  $^{40}\text{K}$  activity concentration ( $\text{Bq kg}^{-1}$ ) in moss (*Hylocomium splendens* (Hedw.) B.S.G.) tissue (n = 24). See Table S2 for location (co-ordinates) of study sites. Uncertainty (unc) quoted at 1 sigma.

Table S2: Site ID, location (easting and northing in Irish Grid (m)), elevation (E), precipitation (P), temperature (T), lead-210 ( $^{210}\text{Pb}$ ) activity concentration, and lead (Pb) concentration in moss tissue.

Equation S1: Normalized Median Absolute Deviation (NMAD).

Figure S1. Photograph of *Hylocomium splendens* (Hedw.) B.S.G. showing a 'stair-step' shape, which is indicative of annual biomass growth. The green shoots are sampled and typically represent the last 2 to 3 years of growth.

Figure S2: The  $^{40}\text{K}$  activity concentration ( $\text{Bq kg}^{-1}$ ) versus  $^7\text{Be}$  activity concentration ( $\text{Bq kg}^{-1}$ ) in *Hylocomium splendens* (Hedw.) B.S.G. across the study sites in Ireland (n = 8,  $r^2 = 0.43$ ,  $p < 0.07$ ).

Figure S3: Predicted against observed (measured) radionuclide activity concentration ( $\text{Bq kg}^{-1}$ ) for  $^{210}\text{Pb}$  (n=24) and  $^7\text{Be}$  (n=8). Independent variables in multiple linear regression equations are precipitation (P), temperature (T) and elevation (E).

Figure S4: Semivariogram (fitted with a Matern model with M. Stein's parameterisation) for  $^{137}\text{Cs}$  found in *Hylocomium splendens* (Hedw.) B.S.G. across the 24 study sites in Ireland (16 sites with observations above DL).

Table S1. Site ID,  $^{210}\text{Pb}$ ,  $^{137}\text{Cs}$ ,  $^7\text{Be}$  and  $^{40}\text{K}$  activity concentration ( $\text{Bq kg}^{-1}$ ) in moss (*Hylocomium splendens* (Hedw.) B.S.G.) tissue (n = 24). See Table S2 for location (co-ordinates) of study sites. Uncertainty (unc) quoted at 1 sigma.

| Site ID | $^{210}\text{Pb}$<br>activity | $^{210}\text{Pb}$ unc | $^{137}\text{Cs}$<br>activity | $^{137}\text{Cs}$ unc | $^7\text{Be}$<br>activity | $^7\text{Be}$ unc | $^{40}\text{K}$<br>activity | $^{40}\text{K}$ unc |
|---------|-------------------------------|-----------------------|-------------------------------|-----------------------|---------------------------|-------------------|-----------------------------|---------------------|
| L680472 | 446.06                        | 76.13                 | 12.54                         | 2.52                  | .                         | .                 | 109.28                      | 41.02               |
| Q598077 | 838.22                        | 50.52                 | 41.38                         | 4.40                  | .                         | .                 | .                           | .                   |
| F869162 | 876.43                        | 61.64                 | 21.17                         | 3.03                  | 412.75                    | 83.71             | 61.47                       | 34.93               |
| L821699 | 697.50                        | 71.17                 | .                             | .                     | .                         | .                 | .                           | .                   |
| V925828 | 511.93                        | 55.37                 | 26.52                         | 3.11                  | .                         | .                 | 73.32                       | 30.54               |
| V870580 | 947.93                        | 58.25                 | 9.68                          | 2.34                  | 339.62                    | 100.36            | 103.95                      | 29.66               |
| M174035 | 515.07                        | 46.02                 | 5.28                          | 2.16                  | .                         | .                 | 57.17                       | 24.51               |
| R170499 | 298.20                        | 40.18                 | .                             | .                     | 484.79                    | 109.81            | 119.64                      | 35.00               |
| W078805 | 835.92                        | 60.94                 | 7.48                          | 2.99                  | 335.64                    | 112.79            | 116.43                      | 36.84               |
| W024681 | 725.47                        | 63.40                 | 9.60                          | 2.92                  | 305.22                    | 111.40            | 96.00                       | 36.95               |
| M372970 | 347.59                        | 37.82                 | 12.34                         | 2.55                  | .                         | .                 | .                           | .                   |
| M402154 | 296.51                        | 37.85                 | .                             | .                     | .                         | .                 | .                           | .                   |
| G969806 | 515.14                        | 49.27                 | 18.99                         | 3.22                  | 283.10                    | 99.44             | 78.12                       | 25.71               |
| G777484 | 968.04                        | 88.90                 | .                             | .                     | 604.35                    | 105.07            | 121.23                      | 25.68               |
| M950441 | 345.76                        | 45.14                 | 3.06                          | 1.40                  | .                         | .                 | 81.97                       | 35.02               |
| C259354 | 431.02                        | 41.57                 | 6.94                          | 2.79                  | 599.99                    | 121.99            | 155.42                      | 23.31               |
| H576776 | 336.66                        | 44.69                 | .                             | .                     | .                         | .                 | 137.05                      | 32.08               |
| H713148 | 336.09                        | 44.63                 | .                             | .                     | .                         | .                 | 81.52                       | 24.77               |
| S814479 | 435.87                        | 52.66                 | 21.35                         | 3.47                  | .                         | .                 | 99.90                       | 34.37               |
| S986202 | 277.54                        | 51.03                 | .                             | .                     | .                         | .                 | 81.02                       | 29.01               |
| N534681 | 225.51                        | 38.50                 | .                             | .                     | .                         | .                 | 85.07                       | 32.91               |
| J114168 | 539.21                        | 57.19                 | 9.20                          | 2.55                  | .                         | .                 | 78.12                       | 44.93               |
| T103962 | 779.54                        | 59.12                 | 8.08                          | 2.37                  | .                         | .                 | .                           | .                   |
| R274984 | 468.16                        | 50.19                 | 11.13                         | 2.32                  | .                         | .                 | .                           | .                   |

Measured radionuclide activity concentrations ( $\text{Bq kg}^{-1}$ ) were corrected for dry weight, and  $^{210}\text{Pb}$  activity concentration was also corrected for self attenuation.

Table S2: Site ID, location (easting and northing in Irish Grid (m)), elevation (E), precipitation (P), temperature (T), lead-210 ( $^{210}\text{Pb}$ ) activity concentration, and lead (Pb) concentration in moss tissue.

| Site ID | Easting  | Northing | E (m)  | P (mm)  | T (°C) | $^{210}\text{Pb}$ activity<br>(Bq kg <sup>-1</sup> ) | Pb<br>(mg kg <sup>-1</sup> ) | $^{210}\text{Pb}/\text{Pb}$<br>(Bq mg <sup>-1</sup> ) |
|---------|----------|----------|--------|---------|--------|------------------------------------------------------|------------------------------|-------------------------------------------------------|
| L680472 | 68027.6  | 247171.9 | 14.75  | 1503.30 | 10.48  | 446.06                                               | 0.4284                       | 1041.1                                                |
| Q598077 | 59844.4  | 107700.9 | 209.25 | 2177.21 | 9.13   | 838.22                                               | 2.5837                       | 324.4                                                 |
| F869162 | 86860.4  | 316187.9 | 72.46  | 1480.73 | 9.37   | 876.43                                               | 1.0712                       | 818.2                                                 |
| L821699 | 82109.4  | 269902.0 | 65.16  | 2198.01 | 9.81   | 697.50                                               | 1.4580                       | 478.4                                                 |
| V925828 | 92456.8  | 82811.3  | 22.07  | 2181.18 | 10.52  | 511.93                                               | 0.5331                       | 960.4                                                 |
| V870580 | 86984.0  | 58041.0  | 141.23 | 2779.97 | 9.88   | 947.93                                               | 0.9222                       | 1027.9                                                |
| M174035 | 117355.4 | 203490.7 | 201.79 | 1780.49 | 9.35   | 515.07                                               | 0.3994                       | 1289.6                                                |
| R170499 | 116983.3 | 149867.2 | 2.26   | 1129.20 | 10.52  | 298.20                                               | 0.5314                       | 561.1                                                 |
| W078805 | 107788.2 | 80502.2  | 70.79  | 2065.52 | 9.93   | 835.92                                               | 1.1351                       | 736.4                                                 |
| W024681 | 102428.6 | 68140.1  | 139.53 | 2392.01 | 9.75   | 725.47                                               | 0.8608                       | 842.8                                                 |
| M372970 | 137232.3 | 296971.9 | 54.54  | 1258.51 | 9.55   | 347.59                                               | 0.1380                       | 2518.0                                                |
| M402154 | 140232.6 | 215408.4 | 20.08  | 1045.40 | 10.30  | 296.51                                               | 0.4513                       | 657.1                                                 |
| G969806 | 196867.2 | 380564.7 | 35.81  | 1632.50 | 9.46   | 515.14                                               | 1.9989                       | 257.7                                                 |
| G777484 | 177741.8 | 348432.0 | 197.89 | 1853.73 | 7.86   | 968.04                                               | 1.3644                       | 709.5                                                 |
| M950441 | 195025.2 | 244096.8 | 70.14  | 978.99  | 9.60   | 345.76                                               | 0.5048                       | 685.0                                                 |
| C259354 | 225926.1 | 435431.7 | 100.49 | 1233.45 | 9.14   | 431.02                                               | 0.6485                       | 664.7                                                 |
| H576776 | 257605.4 | 377645.8 | 180.00 | 1281.73 | 8.35   | 336.66                                               | 2.1733                       | 154.9                                                 |
| H713148 | 271260.3 | 314789.6 | 248.63 | 1067.99 | 8.49   | 336.09                                               | 1.3278                       | 253.1                                                 |
| S814479 | 281410.2 | 147896.2 | 218.00 | 1052.57 | 9.02   | 435.87                                               | 2.4227                       | 179.9                                                 |
| S986202 | 298566.9 | 120183.4 | 175.29 | 1213.40 | 9.70   | 277.54                                               | 1.4668                       | 189.2                                                 |
| N534681 | 253436.2 | 268116.6 | 95.72  | 996.04  | 9.30   | 225.51                                               | 0.5926                       | 380.5                                                 |
| J114168 | 311378.9 | 316814.3 | 264.95 | 1182.42 | 8.46   | 539.21                                               | 2.3375                       | 230.7                                                 |
| T103962 | 310329.0 | 196173.0 | 130.77 | 1913.57 | 8.90   | 779.54                                               | 2.9154                       | 267.4                                                 |
| R274984 | 127375.8 | 198393.0 | 166.95 | 1630.44 | 9.45   | 468.16                                               | 1.2696                       | 368.7                                                 |

$^{210}\text{Pb}$  activity concentration (Bq kg<sup>-1</sup>) was corrected for dry weight and self attenuation.

Equation S1: Normalized Median Absolute Deviation (NMAD) was calculated as

$$\text{Median} [ABS(x_1 - y), ABS(x_2 - y) \dots ABS(x_{24} - y)] \div y \times 100\%$$

where ABS is absolute value, x is the individual value of the variable of interest, and y is the median of the variable of interest.

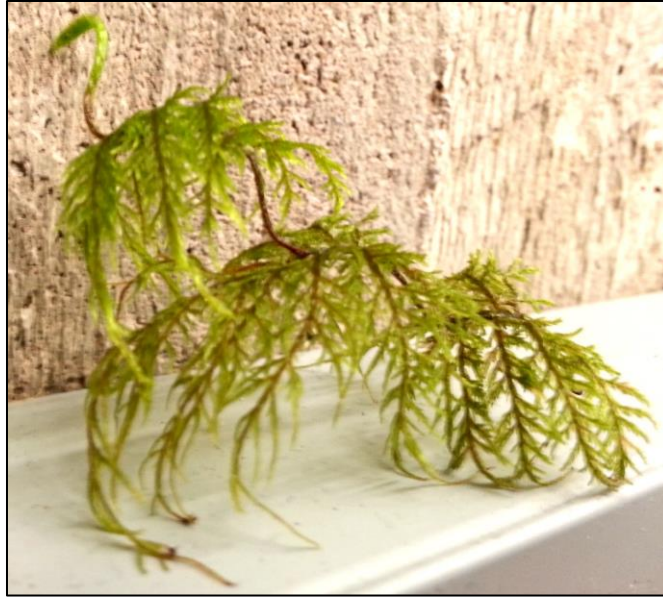

Figure S1. Photograph of *Hylocomium splendens* (Hedw.) B.S.G. tissue showing a 'stair-step' shape, which is indicative of annual biomass growth. The green shoots are sampled and typically represent the last 2 to 3 years of growth. [Photo credit: Phaedra Cowden]

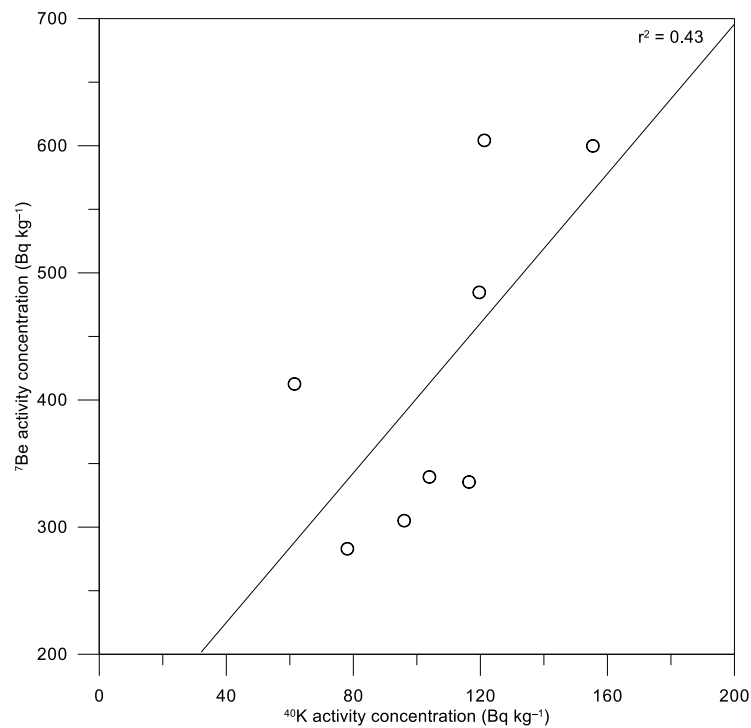

Figure S2: The  $^{40}\text{K}$  activity concentration (Bq kg<sup>-1</sup>) versus  $^7\text{Be}$  activity concentration (Bq kg<sup>-1</sup>) in *Hylocomium splendens* (Hedw.) B.S.G. across the study sites in Ireland ( $n=8$ ,  $r^2 = 0.43$ ,  $p < 0.07$ ).

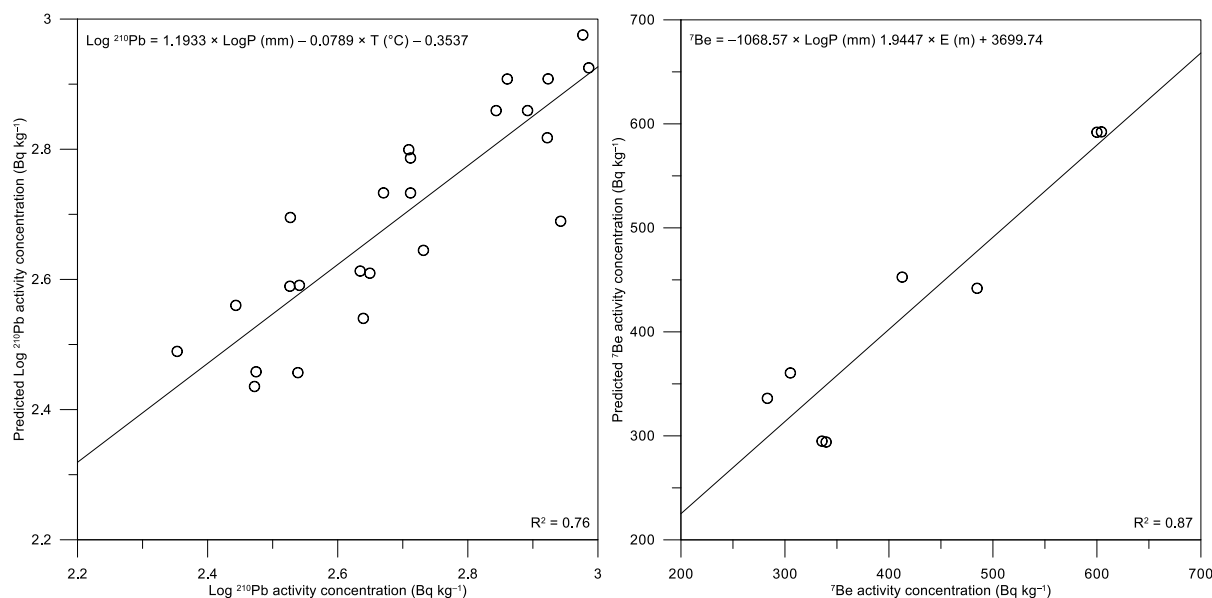

Figure S3: Predicted against observed (measured) radionuclide activity concentration (Bq kg<sup>-1</sup>) for <sup>210</sup>Pb (n=24) and <sup>7</sup>Be (n=8). Independent variables in multiple linear regression equations are precipitation (P), temperature (T) and elevation (E).

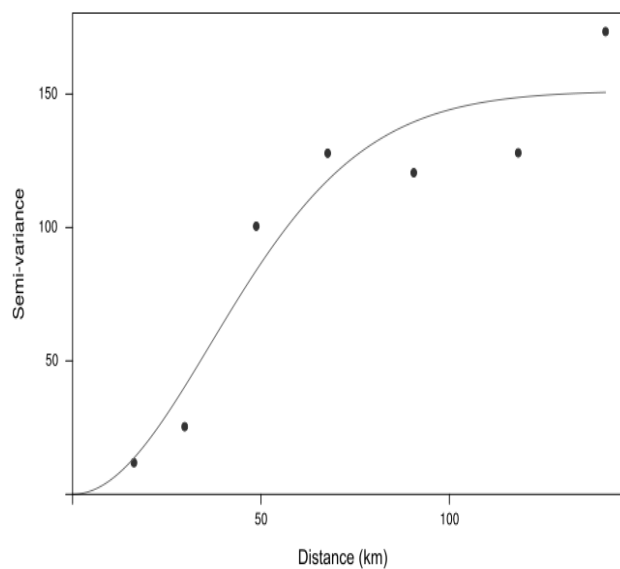

Figure S4: Semivariogram (fitted with a Matern model with M. Stein's parameterisation) for <sup>137</sup>Cs found in *Hylocomium splendens* (Hedw.) B.S.G. across the 24 study sites in Ireland (16 sites with observations above DL).
